# Supplementary material for: Nitric oxide‐enhanced Shiga toxin production was regulated by Fur and RecA in enterohemorrhagic Escherichia coli O157
Source: PubMed Central journal article supplement (PMC5552940; doi:10.1002/mbo3.461), 2017-03-15
Supplement: MBO3-6-na-s001.pdf [file MBO3-6-na-s001.pdf]

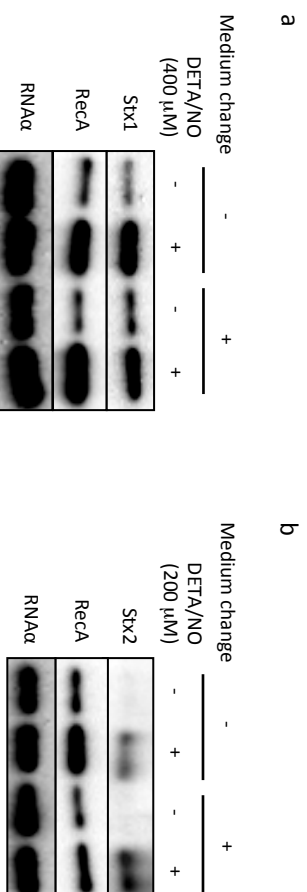

### Supplemental Figure 1

The enhancements of Shiga toxin production and RecA expression in the deleted *norV*-type EHEC are sufficient for exposure to NO at the log phase.

EHEC EDL933 grown overnight was diluted with LB broth containing DETA-NONOate (DETA/NO) and then grown statically at 37°C for 18 h under anaerobic conditions as a control. After 6 h the cells were washed, and medium was changed to LB broth without an NO donor. EHEC were further incubated for 12 h at 37°C under anaerobic conditions.

(a) EHEC strains were fractionated into cell-associated fractions. A 0.2  $\mu$ g sample of each protein of the cell-associated fraction was analyzed by immunoblot analysis using anti-Stx1 antiserum, anti-RecA antibody and anti-RNA  $\alpha$  antibody as an internal control.

(b) EHEC strains were fractionated into the cell-associated fractions and the culture supernatant fractions. A 0.2  $\mu$ g sample of each protein of the cell-associated fraction was analyzed by immunoblot analysis using anti-RecA antibody and anti-RNA  $\alpha$  antibody as an internal control. Each volume, which corresponds to 0.2  $\mu$ g of protein of the cell-associated fraction, of the supernatant fraction was analyzed by immunoblot analysis using anti-Stx2 antiserum.

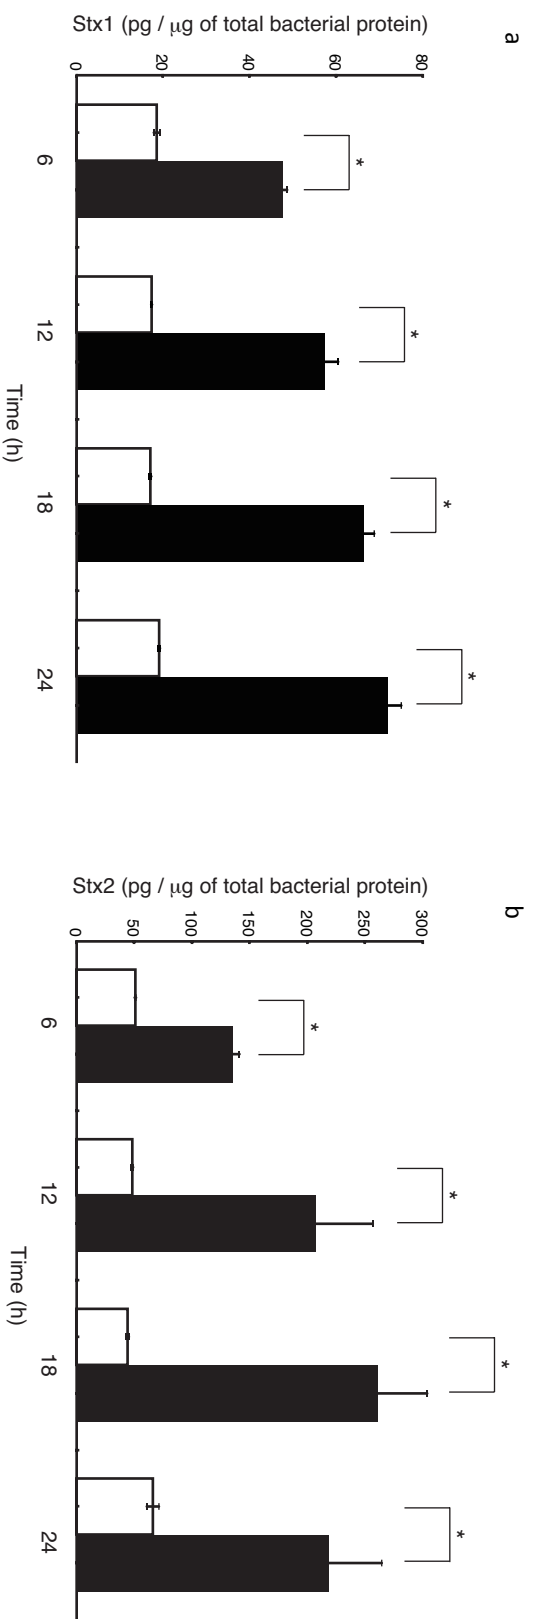

**Supplemental Figure 2**  
 NO enhances the production of Shiga toxins in the deleted *norV*-type EHEC under anaerobic conditions.  
 EHEC EDL933 were cultured in LB medium containing various concentrations of DETA-NONOate (DETA/NO) at 37°C under anaerobic conditions.  
 EHEC strains were fractionated into cell-associated fractions and supernatant fractions at the indicated times. The amount of Stx1 in the cell-associated fraction (a) and the amount of Stx2 in the supernatant fraction (b) were measured by Gb3-ELISA. The amounts of total proteins in the cell-associated fraction were determined by Bradford method.  
 Data are the means  $\pm$  standard deviations of values from three experiments. \* $p < 0.01$ .

Fig. S3

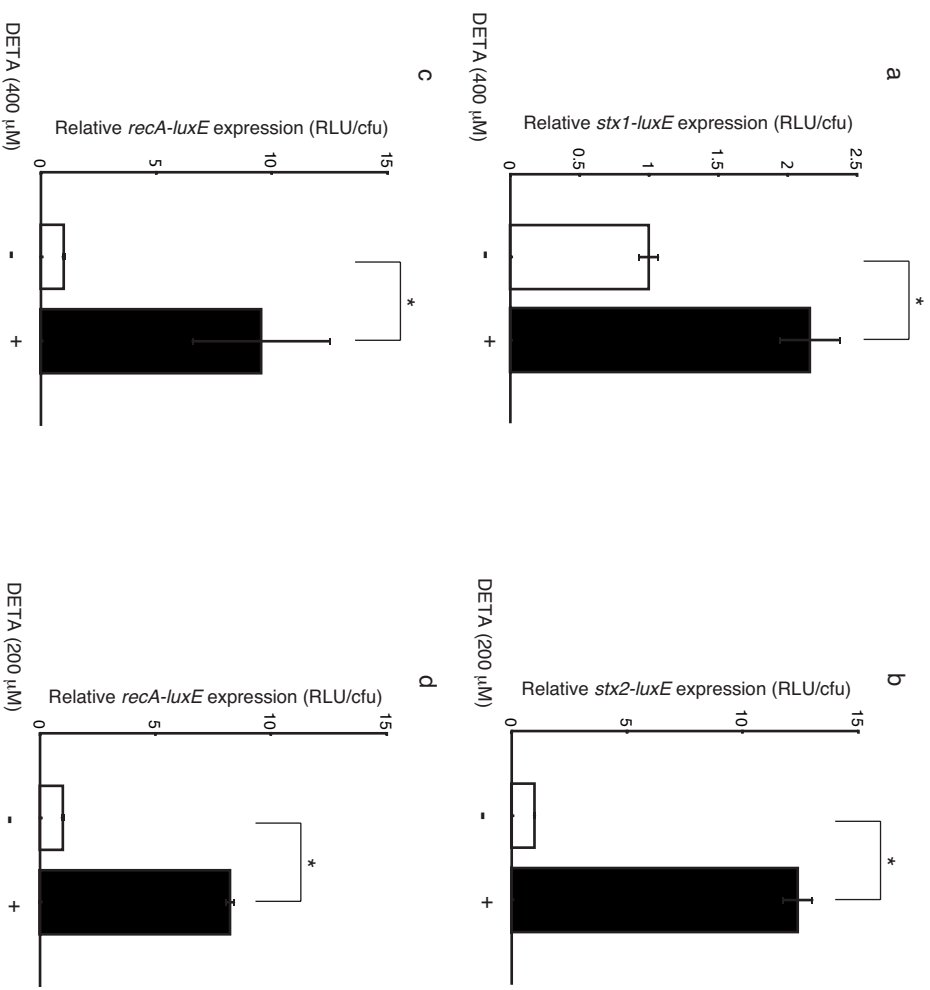

Supplemental Figure 3

NO enhances transcriptions of *stx1*, *stx2* and *recA* in the deleted *norV*-type EHEC under anaerobic conditions. EHEC reporter strains were cultured in LB medium containing various concentrations of DETA-NONoate (DETA/NO) for 18 h at 37°C under anaerobic conditions.

Relative light units (RLU) and the number of bacteria were measured by a luminometer and bacteria plate counts (cfu), respectively.

(a) *stx1*-reporter E1-E2S (pluxCDAB3) treated with or without 400  $\mu$ M DETA/NO.

(b) *stx2*-reporter E(SR)2-E1S (pluxCDAB3) treated with or without 200  $\mu$ M DETA/NO.

(c) *recA*-reporter ERSA (pluxCDAB3) treated with or without 400  $\mu$ M DETA/NO.

(d) *recA*-reporter ERSA (pluxCDAB3) treated with or without 200  $\mu$ M DETA/NO.

Data are the means  $\pm$  standard deviations of values from three experiments. \* $p < 0.01$ .

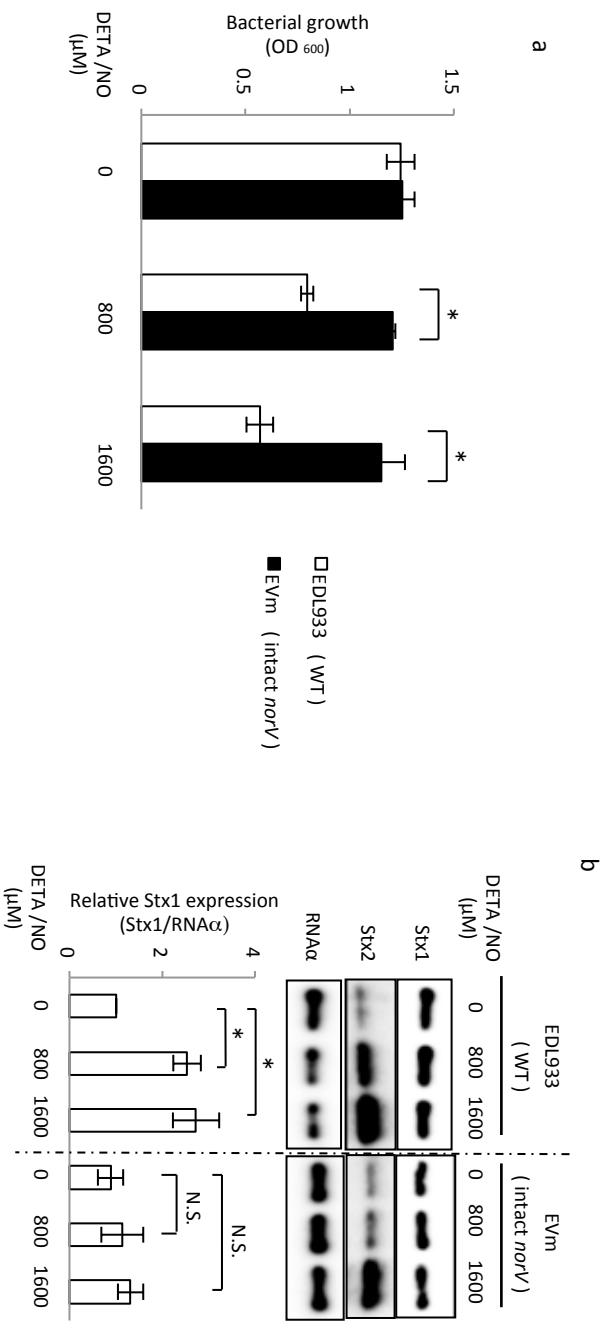

**Supplemental Figure 4**

**Role of Intact *NorV* in NO-mediated aerobic growth inhibition and Shiga toxin production in EHEC under aerobic conditions.**

EHEC strains grown overnight were diluted with LB medium containing various concentrations of DETA-NONOate (DETA/NO) and grown statically for 18 h at 37°C under aerobic conditions.

(a) The optical density at 600 nm (OD<sub>600</sub>) was determined. Data are the means  $\pm$  standard deviations of values from four experiments. \* $p < 0.01$ .

(b) EHEC strains were fractionated into culture supernatant fractions and cell-associated fractions. A 0.2  $\mu$ g sample of each protein of the cell-associated fraction was analyzed by immunoblot analysis using anti-Stx1 antiserum and anti-RNA  $\alpha$  antibody as an internal control. Each volume, which corresponds to 0.2  $\mu$ g of protein of the cell-associated fraction, of the supernatant fraction was analyzed by immunoblot analysis using anti-Stx2 antiserum. The relative amounts of Stx1 and Stx2 were quantified by densitometry and normalized to internal control RNA  $\alpha$ . Data are the means  $\pm$  standard deviations of values from four experiments. \* $p < 0.01$ ; N.S., not significant.

Fig. S5

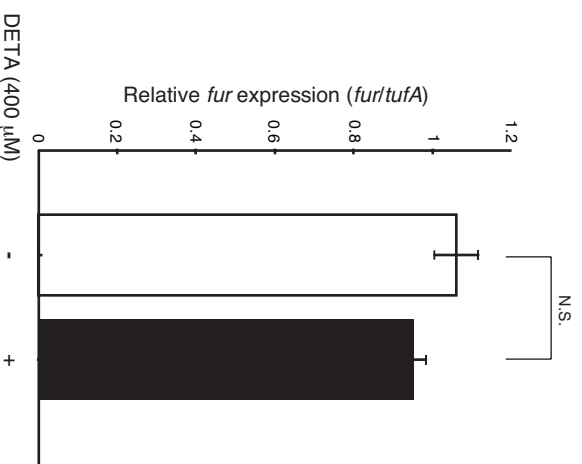

Supplemental Figure 5  
Effect of NO on *fur* expression in the deleted *norV*-type EHEC under anaerobic conditions. EHEC strains grown overnight were diluted with LB medium containing 400  $\mu$ M DETA-NONOate (DETA/NO) and grown statically for 6 h at 37°C under aerobic conditions. The expression level of *fur* mRNA in the deleted *norV*-type EHEC was analyzed by real-time RT-PCR. Data are the means  $\pm$  standard deviations of values from three experiments. N.S., not significant.

Fig. S6

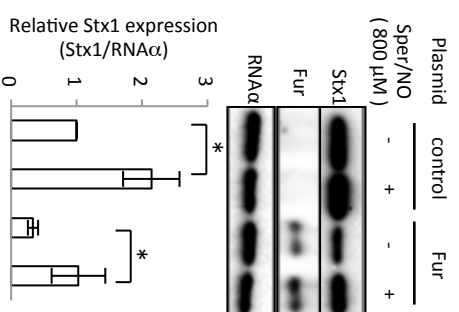

**Supplemental Figure 6**  
Effect of Fur overexpression on NO-enhanced Stx1 production in EHEC under anaerobic conditions. EHEC EDL933 harboring the Fur expression plasmid (pTrcHis2A-fur) or a control plasmid (pTrcHis2A) were cultured in LB medium containing 800 μM NO donor Spermine NONOate (Sper/NO) with or without 1 mM IPTG for 18 h at 37°C under anaerobic conditions. EHEC strains were fractionated into cell-associated fractions. The samples were analyzed by immunoblot analysis using anti-Stx1 antiserum, anti-His Tag antibody for detection of Fur-His and anti-RNAlα antibody as an internal control. The relative amounts of Stx1 were quantified by densitometry and normalized to internal control RNA α. Data are the means ± standard deviations of values from four experiments. \*p < 0.01.

Supplemental Table S1 PCR primers

| Primer | Sequence                                                               | Reference                     |
|--------|------------------------------------------------------------------------|-------------------------------|
| P16    | GTGGCTGGGAAGTACTCG                                                     | Svensson <i>et al.</i> (2010) |
| P17    | AGCCAGACGCCGAGATATTG                                                   | Svensson <i>et al.</i> (2010) |
| P600   | GACCGAGGTAGCCAGAATACTGAACTGTAGTCGCAACACGGTCAGAAAATTAACCCCTCACTAAAGGGCG | This study                    |
| P613   | TCTACGAGTTTGCCAGCCTCCCCAGTGGCTGGCTTTTTTATGTCGGTAATTAACCCCTCACTAAAGGGCG | Shimizu <i>et al.</i> (2009)  |
| P628   | CCACCCCTGAAGGACGGCGTTTTACGGCGCACCGGATAAACGTAACATAACGACTCACTATAGGGCTC   | Shimizu <i>et al.</i> (2009)  |
| P715   | GGCCATGGCCGCTTAGTAACAGGAC                                              | This study                    |
| P724   | ATTAACAATATTTGCCAGGACTTGTGGTTTTTCATTTAGGCGTGGCAATTAACCCCTCACTAAAGGGCG  | This study                    |
| P725   | ACAAATAAGTGAGAGCTGTAACCTCTCGCTTTTCTTATTTCCCTTGCAATAACGACTCACTATAGGGCTC | This study                    |
| P845   | TACAACTTAAAAAGCAAAAGGGCCGAGATGCGACCCCTTGTGTATCAAAATACGACTCACTATAGGGCTC | This study                    |
| P846   | TCGCTGCGCCGTTTAAA                                                      | This study                    |
| P890   | TGGTTGATGACGAAGAGCTG                                                   | Vareille <i>et al.</i> (2007) |
| P891   | GCTCTGTTCCGGAATGTAA                                                    | Vareille <i>et al.</i> (2007) |
| P1049  | CCCAGCTGCCTGTGTATCAATAAATGTT                                           | This study                    |
| P1050  | GGCCATGGATTACACAATACTCCTTGAG                                           | This study                    |
| P1064  | GGGTTAAGCAGCGTGGCAATGTAACCACTCTTATCATGATATGCAGAAAATACGACTCACTATAGGGCTC | This study                    |
| P1077  | GGGCGGCCGCGATCAGTCCGCGTAAT                                             | This study                    |
| P1078  | GGGCGGCCGCAAGACGATTAATAATCTTCGTT                                       | This study                    |
| P1079  | CAATTTTATAAAGGCTCCATCATG                                               | This study                    |
| P1080  | GCCTTTATAAAATTGTTTCTCAAT                                               | This study                    |
| P1081  | GGTAAACTCCATCATGCGCCTG                                                 | This study                    |
| P1082  | GATGGAGTATTTACCAAATTGTTT                                               | This study                    |
| P1085  | ACCGGCCGCGCAGGCACTGGAAATC                                              | This study                    |
| P1086  | TGCCTGCGCGCGGTGTCGGCTG                                                 | This study                    |
| P1089  | ATGTTCAAGTAACCCGAAACCACT                                               | This study                    |
| P1090  | CGGGTTACTGAACATCACACCAAT                                               | This study                    |
| P1093  | CGTCTCGCCATCCGTCGTATCGGC                                               | This study                    |
| P1094  | ACGGATGGCGAGACGAACAGAGGC                                               | This study                    |
| P1095  | AAAGCATACGCGTGTACAGCTAC                                                | This study                    |
| P1096  | CCACGCGTATGCTTTCTCGATCAG                                               | This study                    |
| P1100  | GCGATCAGGTCGCGGTAAT                                                    | This study                    |
| P1215  | TTTGAATGGAATTATCATTTCATTAC                                             | This study                    |
| P1216  | ATAATTCCATTCAAAGAGAGCTGCAA                                             | This study                    |
| P1243  | GTATCGTCACCCGCCACAA                                                    | Yang <i>et al.</i> (2015)     |
| P1244  | CGCAGTGACCGTAAAGATAGAGA                                                | Yang <i>et al.</i> (2015)     |
| P10011 | GGGTCGACTTTGCCTTCGTGCGCGT                                              | This study                    |
| P10002 | AACAGAACATATTGACTATCCGGTATTACCCGGCATGACAGGAGTAAAATTAACCCCTCACTAAAGGGCG | This study                    |

## References

- Svensson, L., Poljakovic, M., Save, S., Gilberthorpe, N., Schon, T., Strid, S., ... Persson, K. (2010). Role of flavohemoglobin in combating nitrosative stress in uropathogenic *Escherichia coli*—implications for urinary tract infection. *Microb pathog* 49: 59–66.
- Yang, B., Feng, L., Wang, F. and Wang, L. (2015). Enterohemorrhagic *Escherichia coli* senses low biotin status in the large intestine for colonization and infection. *Nat Commun* 6: 6592.

Supplemental Table S2 Construction of template *recA*-mutated plasmid

| Mutant plasmid | PCR primers | Template plasmid    |
|----------------|-------------|---------------------|
| precAG22Y1     | P1079-P1080 | pFRT- <i>recA</i> 2 |
| precAG24Y1     | P1081-P1082 | pFRT- <i>recA</i> 2 |
| precAE123A3    | P1093-P1094 | pFRT- <i>recA</i> 2 |
| precAG204S3    | P1095-P1096 | pFRT- <i>recA</i> 2 |
| precAD224A1    | P1089-P1090 | pFRT- <i>recA</i> 2 |
| precAG288Y1    | P1085-P1086 | pFRT- <i>recA</i> 2 |



Supplemental Table S3 Construction of isogenic mutant strains

| Mutant strain | PCR primers | Template plasmid | Parent strain | Target locus              | Kan cassette |
|---------------|-------------|------------------|---------------|---------------------------|--------------|
| ERSA          | P845–P846   | pLCE19           | EDL933        | downstream of <i>recA</i> | –            |
| E1Q1          | P1064–P600  | pFRT-kan         | EDL933        | <i>Q</i> of Stx1-phage    | –            |
| EDLf          | P724–P725   | pFRT-kan         | EDL933        | <i>fur</i>                | –            |
| ERA1-1        | P10002–P845 | pFRT-Kan         | EDL933        | <i>recA</i>               | –            |
| EP            | P613–P628   | pFRT-Kan         | EDL933        | <i>stx1</i> promoter      | –            |
| ERG22Y        | P1100–P845  | precAG22Y1       | ERA1-1        | <i>recA</i>               | –            |
| ERG24Y        | P1100–P845  | precAG24Y1       | ERA1-1        | <i>recA</i>               | –            |
| ERE123A       | P1100–P845  | precAG288Y1      | ERA1-1        | <i>recA</i>               | –            |
| ERG204S       | P1100–P845  | precAD224A1      | ERA1-1        | <i>recA</i>               | –            |
| ERD224A       | P1100–P845  | precAE123A3      | ERA1-1        | <i>recA</i>               | –            |
| ERG288Y       | P1100–P845  | precAG204S3      | ERA1-1        | <i>recA</i>               | –            |

Table S4 Summary of the phenotypes observed for RecA variants in *recA*-deficient *E. coli* harboring mutant RecA expression plasmid and isogenic mutant *recA* EHEC strains

|       | UV sensitivity <sup>a</sup> | Recombination activity <sup>a</sup> | RecA upregulation <sup>a, b</sup> | LexA cleavage <sup>a</sup> | UmuD cleavage <sup>a</sup> | Stx2 expression <sup>b</sup> | NO response <sup>b</sup> |
|-------|-----------------------------|-------------------------------------|-----------------------------------|----------------------------|----------------------------|------------------------------|--------------------------|
|       |                             |                                     | a                                 | b                          |                            |                              |                          |
| Wild  | -                           | +++++                               | +                                 | +                          | +                          | +                            | +                        |
| G22Y  | ++                          | +                                   | +                                 | -                          | -                          | +                            | -                        |
| G24Y  | -                           | +                                   | +                                 | +                          | +                          | +                            | +                        |
| E123A | +++++                       | -                                   | -                                 | -                          | -                          | -                            | -                        |
| G204S | ++                          | ++++                                | -                                 | -                          | -                          | -                            | -                        |
| D224A | ++++                        | -                                   | -                                 | -                          | -                          | -                            | -                        |
| G288Y | -                           | +                                   | +                                 | +                          | +                          | +                            | +                        |

<sup>a</sup>These results were reported from Adikesavan et al using *recA*-deficient *E. coli* strains harboring mutant RecA expression plasmid (Adikesavan et al., 2011). UV sensitivity and recombination activity were estimated by UV survival assay and P-1 transduction assay, respectively (Adikesavan et al., 2011). RecA upregulation, LexA cleavage induction and UmuD cleavage induction were analyzed by Western blotting (Adikesavan et al., 2011). The cultures of RecA-wild type or mutant *E. coli* strains were added nalidixic acid (100 µg/ml) and then incubated for 60 min at 37°C (Adikesavan et al., 2011).

<sup>b</sup>These results were indicated in this study using isogenic mutant *recA* EHEC strains (ERG22Y, ERG24Y, ERE123A, ERG204S, ERD224A and ERG288Y). RecA upregulation and Stx2 production were analyzed by Western blotting. The cultures of wild-typeEHEC or mutant EHEC strains were treated with or without DETA-NONOate (200 µM) and then incubated for 18 h at 37°C under anaerobic conditions.
